# Supplementary material for: The various architectures and properties of a series of coordination polymers tuned by the central metals and auxiliary N-donor ligands
Source: Royal Society of Chemistry journal article supplement (doi:10.1039/c4ce01602e), 2014-10-14
Supplement: c4ce01602e1.pdf [file c4ce01602e1.pdf]

## Electronic Supporting Information

### The various architectures and properties of a series of coordination polymers tuned by the central metals and auxiliary N-donor ligands

He Wu,<sup>a</sup> Wujian Sun,<sup>a</sup> Ting Shi,<sup>a</sup> Xuzhao Liao,<sup>a</sup> Wenjie Zhao,<sup>b</sup> and Xuwu Yang<sup>\*a</sup>

<sup>a</sup> Key Laboratory of Synthetic and Natural Functional Molecule Chemistry of Ministry of Education, Shaanxi Key Laboratory of Physico-Inorganic Chemistry, College of Chemistry & Materials Science, Northwest University, Xi'an 710069, P. R. China. E-mail: yangxuwu@nwu.edu.cn.

<sup>b</sup> Department of Biochemical Engineering, Xianyang Vocational Technical college, Xianyang, 712000, P. R. China.

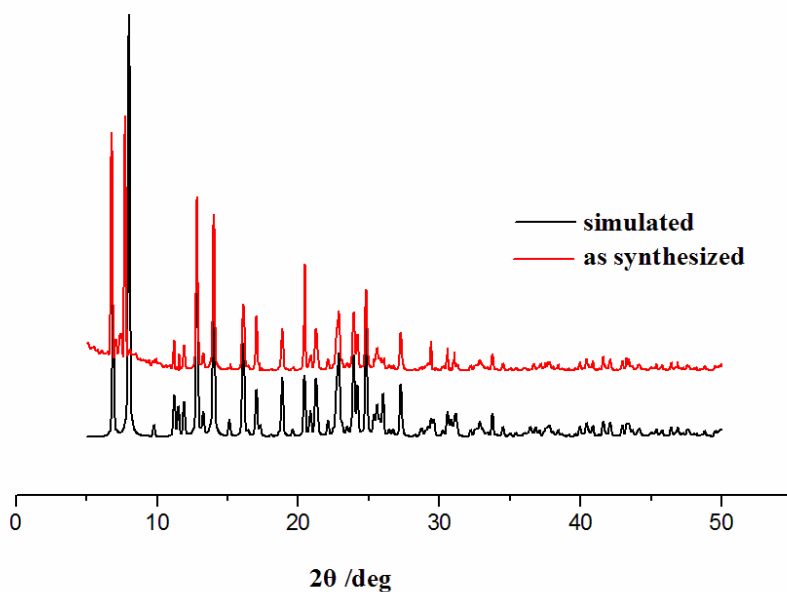

Fig. S1 PXRD of Complex 1.

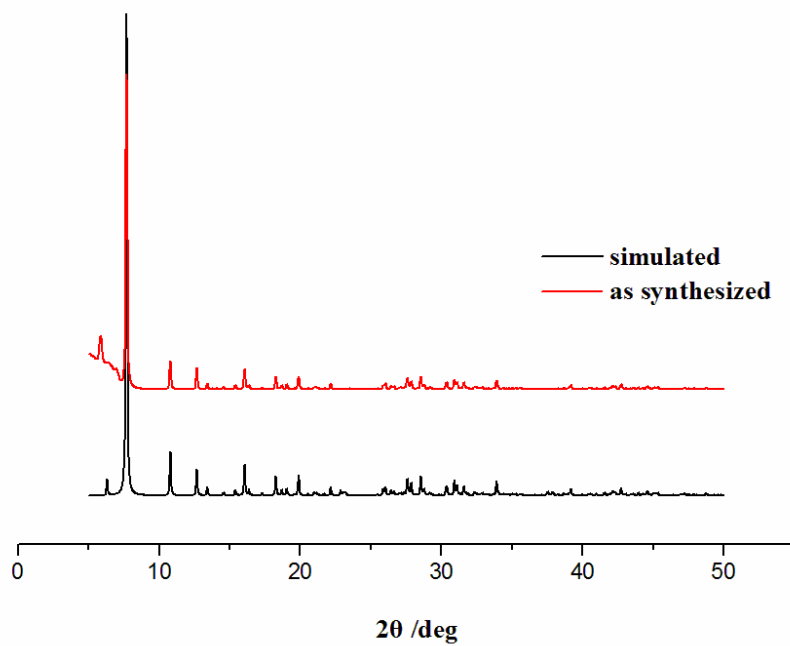

Fig. S2 PXRD of Complex 2.

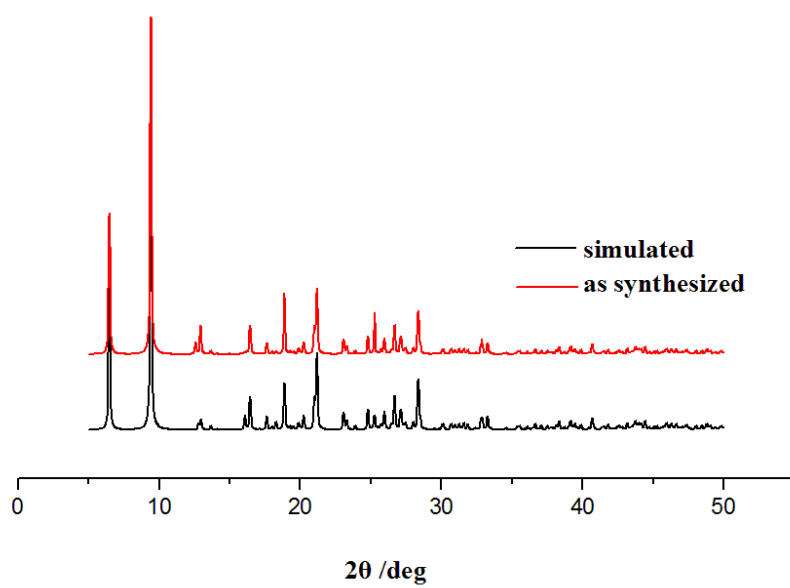

Fig. S3 PXRD of Complex 3.

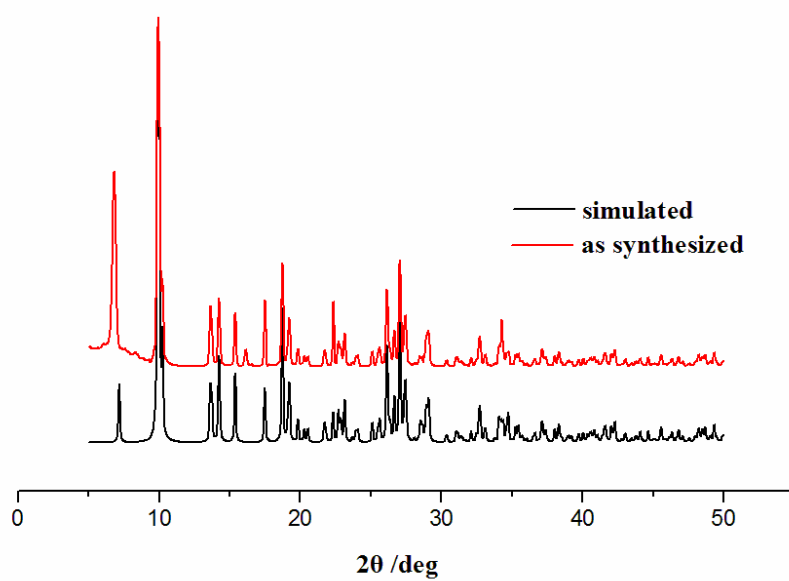

**Fig. S4** PXR D of Complex 4.

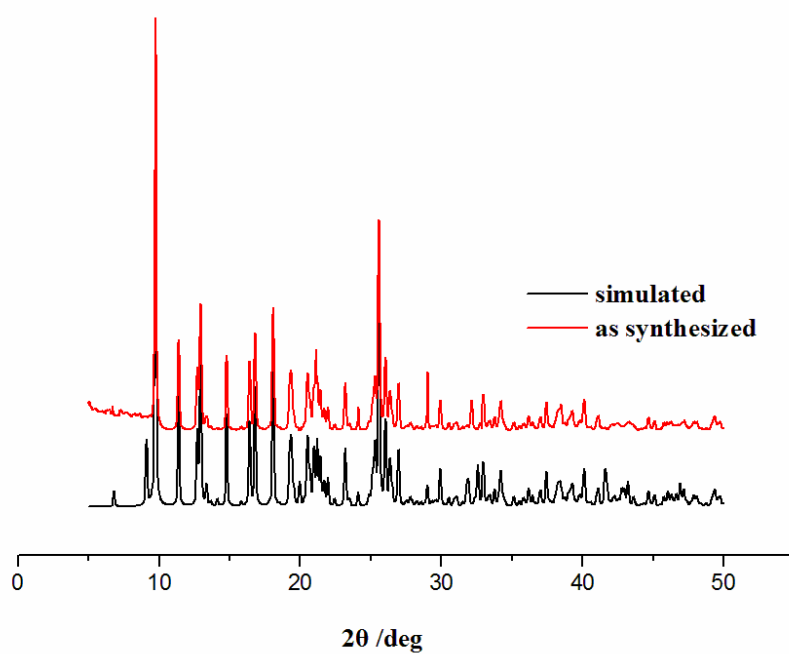

**Fig. S5** PXR D of Complex 5.

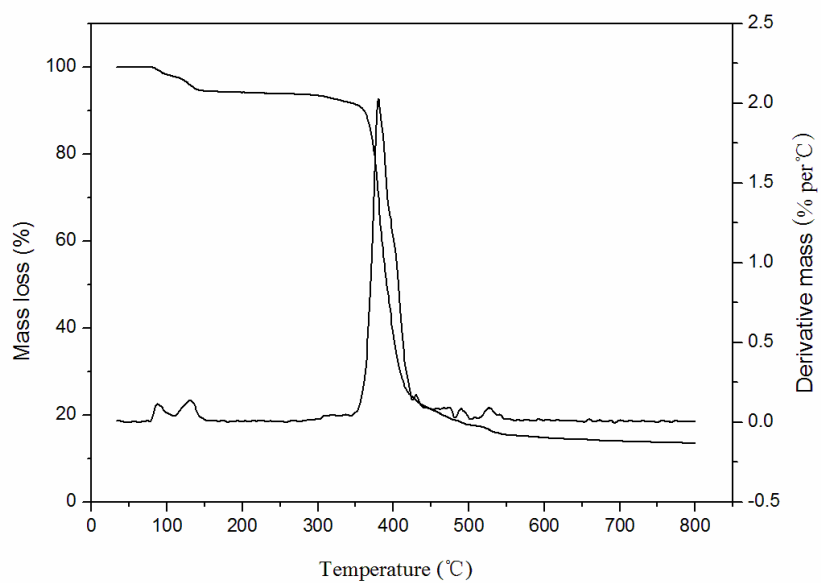

**Fig. S6** TG-DTG curve of Complex 1.

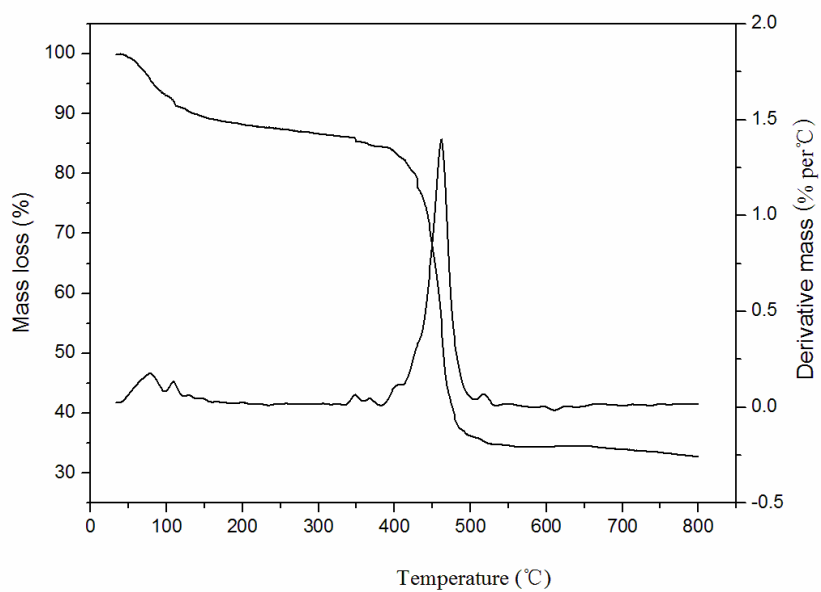

**Fig. S7** TG-DTG curve of Complex 2.

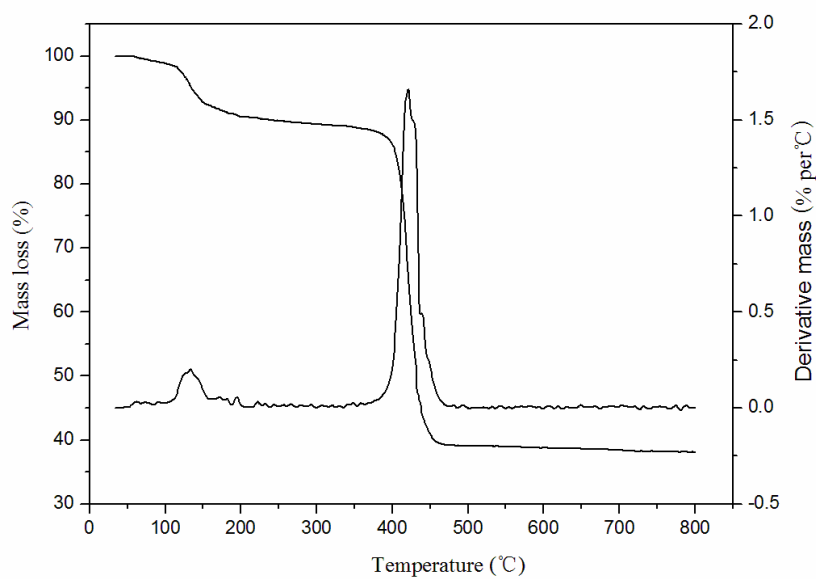

**Fig. S8** TG-DTG curve of Complex 3.

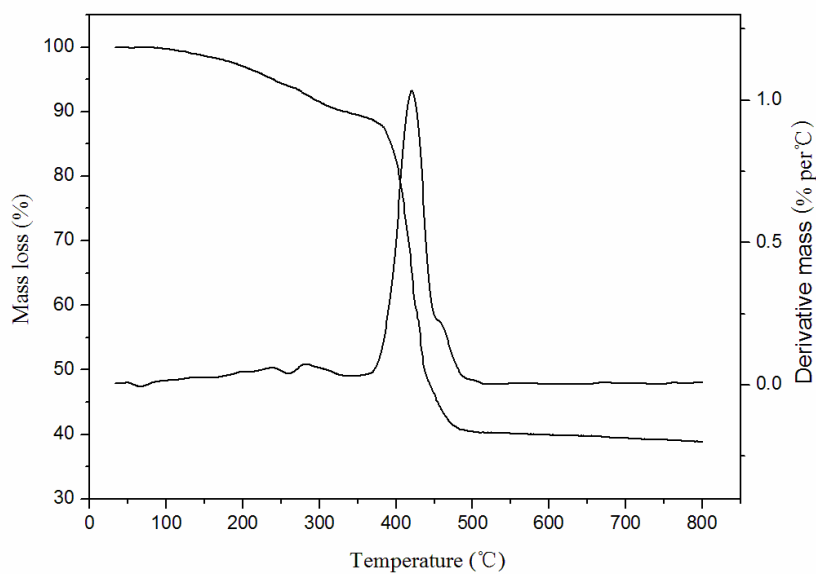

**Fig. S9** TG-DTG curve of Complex 4.

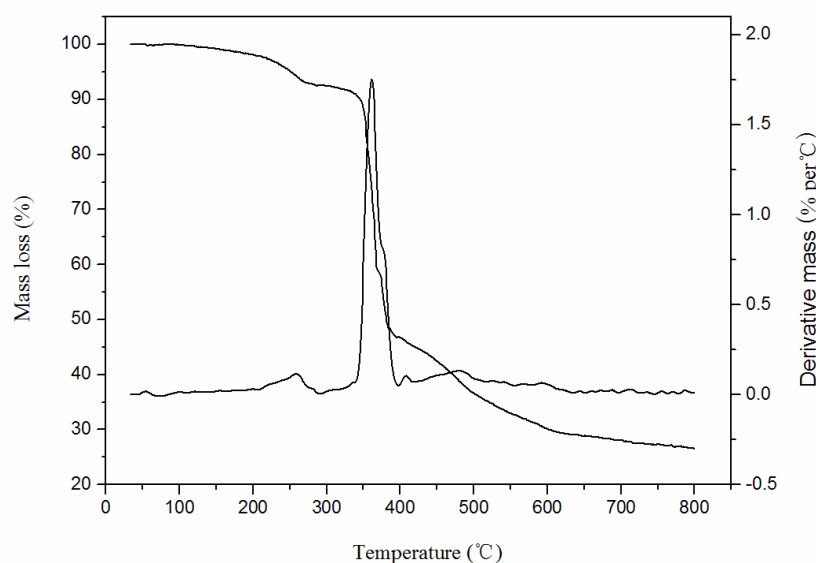

**Fig. S10** TG-DTG curve of Complex 5.

Table S1. Selected bond lengths [ $\text{\AA}$ ] and angles [ $^\circ$ ] for **1-5<sup>d</sup>**

| <b>Complex 1</b>  |            |                   |            |
|-------------------|------------|-------------------|------------|
| Zn(1)-O(2)        | 1.950(5)   | Zn(1)-O(4)B       | 2.205(6)   |
| Zn(1)-O(3)B       | 2.213(7)   | O(4)-Zn(1)        | 2.205(6)   |
| O(3)-Zn(1)        | 2.213(7)   | Zn(1)-N(1)A       | 2.009(6)   |
| Zn(1)-N(2)        | 2.012(5)   | N(1)-Zn(1)        | 2.009(6)   |
| O(2)-Zn(1)-N(1)A  | 122.5(2)   | O(2)-Zn(1)-N(2)   | 101.6(2)   |
| N(1)A-Zn(1)-N(2)  | 105.3(2)   | O(2)-Zn(1)-O(4)B  | 100.9(2)   |
| N(1)A-Zn(1)-O(4)B | 124.8(2)   | N(2)-Zn(1)-O(4)B  | 96.4(2)    |
| O(2)-Zn(1)-O(3)B  | 88.4(2)    | N(1)A-Zn(1)-O(3)B | 88.1(2)    |
| N(2)-Zn(1)-O(3)B  | 154.6(2)   | O(4)B-Zn(1)-O(3)B | 58.6(2)    |
| <b>Complex 2</b>  |            |                   |            |
| O(1)-Zn(2)        | 1.987(4)   | O(2)-Zn(1)        | 1.973(3)   |
| O(3)-Zn(1)A       | 2.051(4)   | O(4)-Zn(2)B       | 2.094(4)   |
| O(5)-Zn(1)E       | 1.932(4)   | O(7)-Zn(2)F       | 2.003(3)   |
| O(7)-Zn(1)        | 2.018(3)   | O(7)-Zn(2)        | 2.078(3)   |
| O(8)-Zn(2)        | 2.096(4)   | Zn(1)-O(5)C       | 1.932(4)   |
| Zn(1)-O(3)B       | 2.051(4)   | Zn(2)-O(7)D       | 2.003(3)   |
| Zn(2)-O(4)A       | 2.094(4)   | Zn(2)F-O(7)-Zn(1) | 122.30(16) |
| Zn(2)F-O(7)-Zn(2) | 117.27(15) | Zn(1)-O(7)-Zn(2)  | 98.80(14)  |
| O(5)C-Zn(1)-O(2)  | 108.73(16) | O(5)C-Zn(1)-O(7)  | 143.58(15) |
| O(2)-Zn(1)-O(7)   | 100.76(14) | O(5)C-Zn(1)-O(3)B | 103.77(14) |
| O(2)-Zn(1)-O(3)B  | 94.05(14)  | O(7)-Zn(1)-O(3)B  | 94.77(14)  |
| O(1)-Zn(2)-O(7)D  | 138.46(15) | O(1)-Zn(2)-O(7)   | 104.54(14) |
| O(7)D-Zn(2)-O(7)  | 116.98(13) | O(1)-Zn(2)-O(4)A  | 92.73(15)  |

|                   |           |                  |            |
|-------------------|-----------|------------------|------------|
| O(7)D-Zn(2)-O(4)A | 91.90(14) | O(7)-Zn(2)-O(4)A | 82.02(13)  |
| O(1)-Zn(2)-O(8)   | 86.07(16) | O(7)D-Zn(2)-O(8) | 92.94(15)  |
| O(7)-Zn(2)-O(8)   | 92.51(15) | O(4)A-Zn(2)-O(8) | 173.93(16) |

### Complex 3

|                   |            |                    |            |
|-------------------|------------|--------------------|------------|
| Cd(1)-O(4)        | 2.393(4)   | Cd(1)-O(4)A        | 2.393(4)   |
| Cd(1)-O(3)        | 2.419(4)   | Cd(1)-O(3)A        | 2.419(4)   |
| Cd(1)-O(1)B       | 2.443(4)   | Cd(1)-O(1)C        | 2.443(4)   |
| Cd(1)-O(2)B       | 2.494(4)   | Cd(1)-O(2)C        | 2.494(4)   |
| Cd(2)-O(8)        | 2.233(5)   | Cd(2)-O(6)         | 2.277(4)   |
| Cd(2)-O(7)        | 2.282(5)   | Cd(2)-O(5)         | 2.334(4)   |
| Cd(2)-O(1)D       | 2.359(4)   | Cd(2)-O(2)E        | 2.361(4)   |
| O(1)-Cd(2)D       | 2.359(4)   | O(1)-Cd(1)B        | 2.443(4)   |
| O(2)-Cd(2)E       | 2.361(4)   | O(2)-Cd(1)B        | 2.494(4)   |
| O(4)-Cd(1)-O(4)A  | 126.7(2)   | O(4)-Cd(1)-O(3)    | 54.39(14)  |
| O(4)A-Cd(1)-O(3)  | 178.91(15) | O(3)-Cd(1)-O(3)A   | 124.5(2)   |
| O(4)-Cd(1)-O(1)B  | 100.31(14) | O(4)A-Cd(1)-O(1)B  | 102.43(13) |
| O(3)-Cd(1)-O(1)B  | 77.21(13)  | O(3)A-Cd(1)-O(1)B  | 79.19(13)  |
| O(4)-Cd(1)-O(1)C  | 102.43(13) | O(4)A-Cd(1)-O(1)C  | 100.31(14) |
| O(3)-Cd(1)-O(1)C  | 79.19(13)  | O(3)A-Cd(1)-O(1)C  | 77.21(13)  |
| O(1)B-Cd(1)-O(1)C | 127.87(18) | O(4)-Cd(1)-O(2)B   | 80.40(14)  |
| O(4)A-Cd(1)-O(2)B | 76.68(14)  | O(3)-Cd(1)-O(2)B   | 103.81(13) |
| O(3)A-Cd(1)-O(2)B | 99.99(13)  | O(1)B-Cd(1)-O(2)B  | 52.45(12)  |
| O(1)C-Cd(1)-O(2)B | 176.79(12) | O(4)-Cd(1)-O(2)C   | 76.68(14)  |
| O(4)A-Cd(1)-O(2)C | 80.40(14)  | O(3)-Cd(1)-O(2)C   | 99.99(13)  |
| O(3)A-Cd(1)-O(2)C | 103.81(13) | O(1)B-Cd(1)-O(2)C  | 176.79(12) |
| O(1)C-Cd(1)-O(2)C | 52.45(12)  | O(2)B-Cd(1)-O(2)C  | 127.44(17) |
| O(8)-Cd(2)-O(1)D  | 81.90(16)  | O(6)-Cd(2)-O(1)D   | 111.81(13) |
| O(7)-Cd(2)-O(1)D  | 78.66(15)  | O(5)-Cd(2)-O(1)D   | 105.59(14) |
| O(8)-Cd(2)-O(2)E  | 82.68(17)  | O(6)-Cd(2)-O(2)E   | 98.50(13)  |
| O(7)-Cd(2)-O(2)E  | 79.58(15)  | O(5)-Cd(2)-O(2)E   | 105.82(14) |
| O(1)D-Cd(2)-O(2)E | 144.84(12) | Cd(2)D-O(1)-Cd(1)B | 133.95(16) |

### Complex 4

|                   |          |                  |          |
|-------------------|----------|------------------|----------|
| Cd(1)-O(3)A       | 2.303(5) | Cd(1)-O(3)B      | 2.303(5) |
| Cd(1)-O(1)C       | 2.232(5) | Cd(1)-O(1)       | 2.232(5) |
| Cd(1)B-O(3)       | 2.303(5) | Cd(2)-O(3)A      | 2.398(5) |
| Cd(2)-O(5)D       | 2.539(5) | Cd(2)-O(5)E      | 2.328(5) |
| Cd(2)-O(6)D       | 2.237(5) | Cd(2)-O(2)       | 2.158(5) |
| Cd(2)-O(4)A       | 2.306(6) | Cd(2)F-O(3)      | 2.398(5) |
| Cd(2)E-O(5)       | 2.328(5) | Cd(2)G-O(5)      | 2.539(5) |
| Cd(2)G-O(6)       | 2.237(5) | Cd(2)F-O(4)      | 2.306(6) |
| Cd(1)-N(1)        | 2.305(8) | Cd(1)-N(1)C      | 2.305(8) |
| O(3)A-Cd(1)-O(3)B | 163.2(3) | O(3)A-Cd(1)-N(1) | 101.0(2) |
| O(3)A-Cd(1)-N(1)C | 91.4(2)  | O(3)B-Cd(1)-N(1) | 91.4(2)  |
| O(3)B-Cd(1)-N(1)C | 101.0(2) | O(1)-Cd(1)-O(3)B | 82.6(2)  |

|                    |            |                   |            |
|--------------------|------------|-------------------|------------|
| O(1)C-Cd(1)-O(3)A  | 82.6(2)    | O(1)-Cd(1)-O(3)A  | 88.2(2)    |
| O(1)C-Cd(1)-O(3)B  | 88.2(2)    | O(1)C-Cd(1)-O(1)  | 113.3(4)   |
| O(1)-Cd(1)-N(1)C   | 81.6(3)    | O(1)C-Cd(1)-N(1)C | 163.6(3)   |
| O(1)C-Cd(1)-N(1)   | 81.6(3)    | O(1)-Cd(1)-N(1)   | 163.6(3)   |
| N(1)C-Cd(1)-N(1)   | 84.6(5)    | O(3)A-Cd(2)-O(5)D | 134.51(17) |
| O(5)E-Cd(2)-O(3)A  | 148.37(18) | O(5)E-Cd(2)-O(5)D | 74.54(19)  |
| O(6)D-Cd(2)-O(3)A  | 88.67(19)  | O(6)D-Cd(2)-O(5)E | 105.78(19) |
| O(6)D-Cd(2)-O(5)D  | 54.59(18)  | O(6)D-Cd(2)-O(4)A | 101.2(2)   |
| O(2)-Cd(2)-O(3)A   | 97.96(19)  | O(2)-Cd(2)-O(5)E  | 91.2(2)    |
| O(2)-Cd(2)-O(5)D   | 93.07(19)  | O(2)-Cd(2)-O(6)D  | 135.3(2)   |
| O(2)-Cd(2)-O(4)A   | 118.9(2)   | O(4)A-Cd(2)-O(3)A | 55.32(19)  |
| O(4)A-Cd(2)-O(5)D  | 146.54(18) | O(4)A-Cd(2)-O(5)E | 93.8(2)    |
| Cd(1)B-O(3)-Cd(2)F | 110.9(2)   |                   |            |

### Complex 5

|                   |            |                   |           |
|-------------------|------------|-------------------|-----------|
| Cd(1)-O(2)        | 2.256(5)   | Cd(1)-O(2)A       | 2.256(5)  |
| Cd(1)-O(3)B       | 2.431(6)   | Cd(1)-O(3)C       | 2.431(6)  |
| Cd(1)-O(4)C       | 2.434(6)   | Cd(1)-O(4)B       | 2.434(6)  |
| Cd(2)-O(5)        | 2.283(5)   | Cd(2)-O(7)D       | 2.300(5)  |
| Cd(2)-O(8)        | 2.386(5)   | Cd(2)-O(6)        | 2.436(5)  |
| O(3)-Cd(1)E       | 2.431(6)   | O(4)-Cd(1)E       | 2.434(6)  |
| Cd(2)-N(4)B       | 2.288(6)   | Cd(2)-N(1)        | 2.305(6)  |
| N(4)-Cd(2)E       | 2.288(5)   | O(2)-Cd(1)-O(2)A  | 128.3(3)  |
| O(2)-Cd(1)-O(3)B  | 129.32(19) | O(2)A-Cd(1)-O(3)B | 92.2(2)   |
| O(3)B-Cd(1)-O(3)C | 79.2(4)    | O(2)-Cd(1)-O(4)C  | 119.4(2)  |
| O(2)A-Cd(1)-O(4)C | 79.82(18)  | O(3)B-Cd(1)-O(4)C | 93.8(2)   |
| O(3)C-Cd(1)-O(4)C | 51.59(19)  | O(2)-Cd(1)-O(4)B  | 79.82(18) |
| O(2)A-Cd(1)-O(4)B | 119.4(2)   | O(3)B-Cd(1)-O(4)B | 51.59(19) |
| O(3)C-Cd(1)-O(4)B | 93.8(2)    | O(4)C-Cd(1)-O(4)B | 137.8(3)  |
| O(5)-Cd(2)-N(4)B  | 91.39(19)  | O(5)-Cd(2)-O(7)D  | 91.44(17) |
| N(4)B-Cd(2)-O(7)D | 102.0(2)   | O(5)-Cd(2)-N(1)   | 87.58(19) |
| N(4)B-Cd(2)-N(1)  | 171.3(2)   | O(7)D-Cd(2)-N(1)  | 86.67(19) |
| O(5)-Cd(2)-O(8)   | 174.72(17) | N(4)B-Cd(2)-O(8)  | 89.8(2)   |
| O(7)D-Cd(2)-O(8)  | 83.28(17)  | N(1)-Cd(2)-O(8)   | 92.02(19) |
| O(5)-Cd(2)-O(6)   | 104.24(18) | N(4)B-Cd(2)-O(6)  | 84.6(2)   |
| O(7)D-Cd(2)-O(6)  | 162.90(18) | N(1)-Cd(2)-O(6)   | 87.22(19) |
| O(8)-Cd(2)-O(6)   | 80.99(19)  |                   |           |

<sup>4</sup>Symmetry codes: complex 1: (A)  $x+1/2, -y+3/2, z-1/2$ ; (B)  $-x+3/2, y-1/2, -z+1/2$ ; complex 2: (A)  $-x, y+1/2, -z+3/2$ ; (B)  $-x, y-1/2, -z+3/2$ ; (C)  $x, -y+3/2, z-1/2$ ; (D)  $-x+1/2, y+1/2, z$ ; (E)  $x, -y+3/2, z+1/2$ ; (F)  $-x+1/2, y-1/2, z$ ; complex 3: (A)  $-x+1, y, -z+1/2$ ; (B)  $-x+1, -y+2, -z+1$ ; (C)  $x, -y+2, z-1/2$ ; (D)  $-x+1/2, -y+3/2, -z+1$ ; (E)  $-x+1/2, -y+5/2, -z+1$ ; complex 4: (A)  $x+1/2, -y+3/2, z+1/2$ ; (B)  $-x+3/2, -y+3/2, -z+1$ ; (C)  $-x+2, y, -z+3/2$ ; (D)  $x+1, -y+1, z+1/2$ ; (E)  $-x+1, y, -z+3/2$ ; (F)  $x-1/2, -$



$y+3/2, z-1/2$ ; (G)  $x-1, -y+1, z-1/2$ ; complex 5: (A)  $-x+1/2, y, -z+1/2$ ; (B)  $x-1, y-1, z$ ; (C)  $-x+3/2, y-1, -z+1/2$ ; (D)  $-x+2, -y+1, -z+1$ ; (E)  $x+1, y+1, z$ .
